# Supplementary material for: The Gut Microbiome Responds Progressively to Fat and/or Sugar-Rich Diets and Is Differentially Modified by Dietary Fat and Sugar
Source: MDPI journal article supplement (doi:10.3390/nu15092097), 2023-04-27
Supplement: s1 [file s1]

*Article*

# **The gut microbiome responds progressively to fat and/or sugar-rich diets and is differentially modified by dietary fat and sugar**

**João Pessoa<sup>1,#</sup>, Getachew D. Belew<sup>1,#</sup>, Cristina Barroso<sup>1,2</sup>, Conceição Egas<sup>1,2,\*</sup> and John G. Jones<sup>1</sup>**

<sup>1</sup> CNC – Center for Neuroscience and Cell Biology, CIBB – Center for Innovative Biomedicine and Biotechnology, University of Coimbra, Coimbra, Portugal

<sup>2</sup> Biocant – Technology Transfer Association, Biocant Park, Cantanhede, Portugal

# These authors contributed equally to this work.

\* Correspondence: cegas@biocant.pt

## **Supplementary Materials**

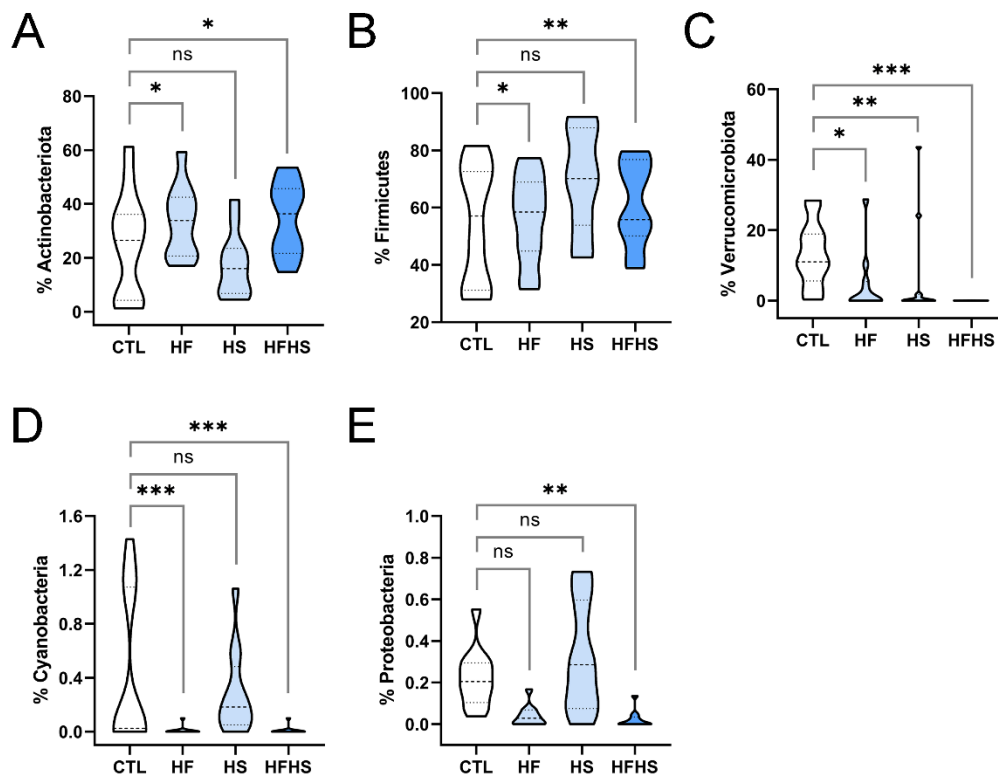

**Supplementary figure S1.** Bacterial phyla whose percentages in the gut microbiome were affected by high-fat, high-sugar, or high-fat high-sugar diets, at 9 weeks of diet. In each panel, the range of percentages of specific bacterial phyla under control (CTL), high-fat (HF), high-sugar (HS), and high-fat, high-sugar (HFHS) are represented. Dashed and dotted lines represent the median and interquartile separations, respectively. Asterisks indicate statistically significant differences and represent p-values adjusted using the Holm–Bonferroni method (\*:  $0.05 > p > 0.005$ ; \*\*:  $0.005 > p > 0.0005$ ; \*\*\*:  $p < 0.0005$ ; ns: non-significant).

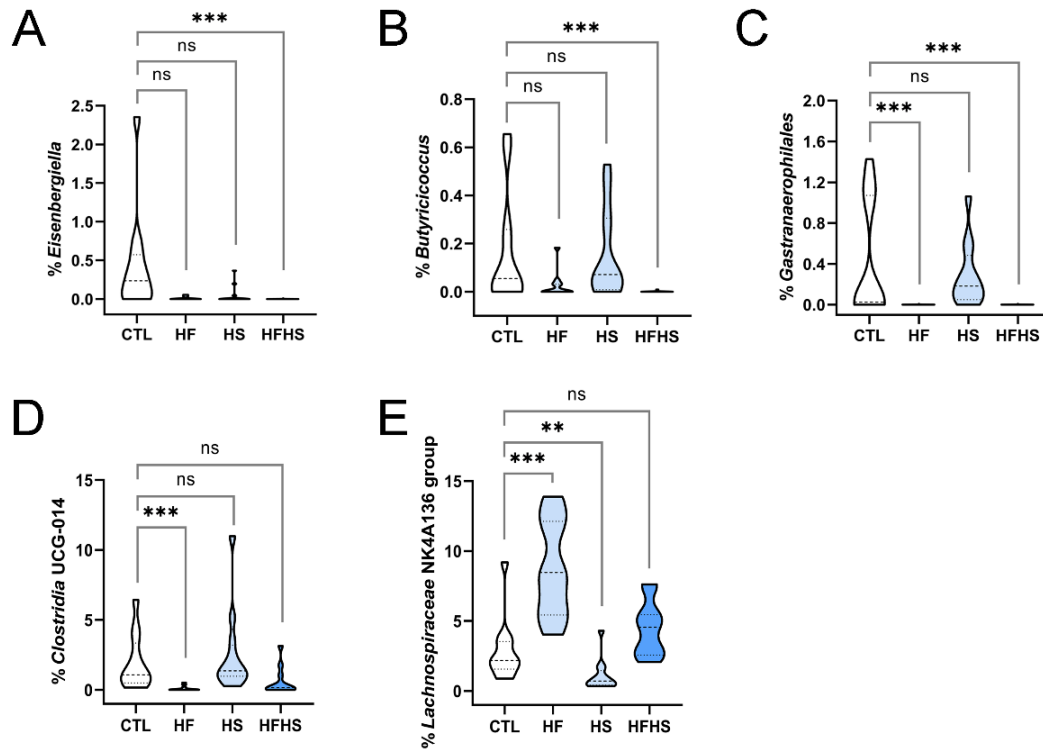

**Supplementary figure S2.** Bacterial genera whose percentages in the gut microbiome were unstable under the control diet and were further affected by high-fat, high-sugar, or high-fat high-sugar diets. Here, the effects are shown at 9 weeks (A-D) and 18 weeks (E) of diet. In each panel, the range of percentages of a specific bacterial genus under control (CTL), high-fat (HF), high-sugar (HS), and high-fat, high-sugar (HFHS) are represented. Dashed and dotted lines represent the median and interquartile separations, respectively. Asterisks indicate statistically significant differences and represent p-values adjusted using the Holm–Bonferroni method (\*\*:  $0.005 > p > 0.0005$ ; \*\*\*:  $p < 0.0005$ ; ns: non-significant).

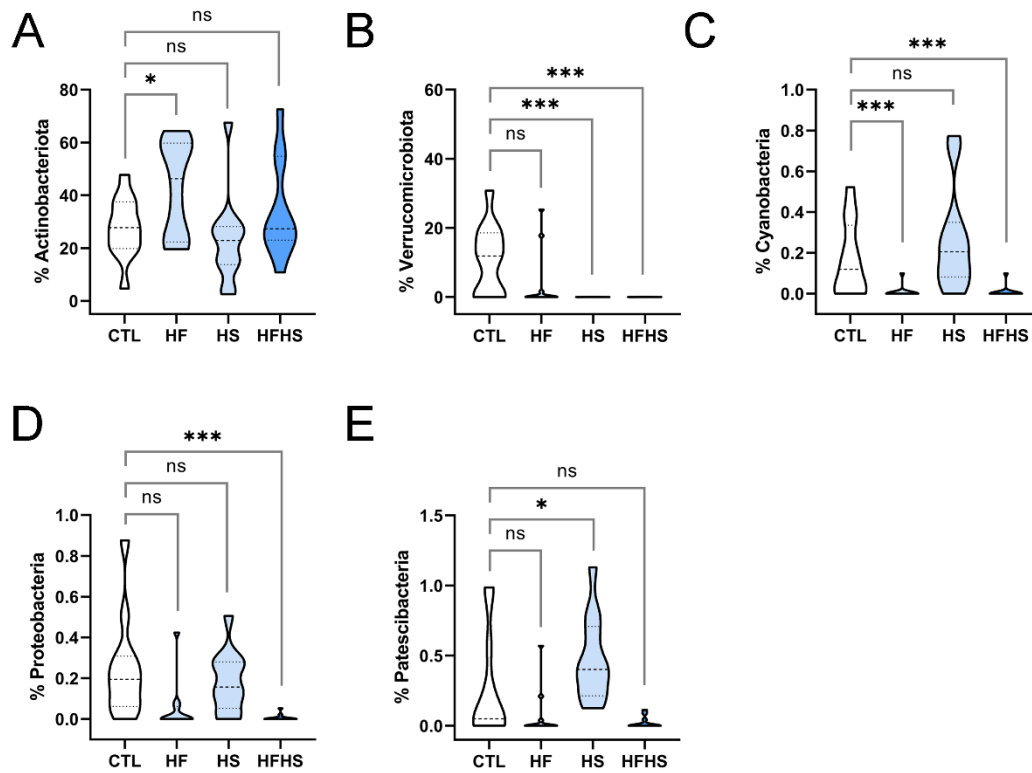

**Supplementary figure S3.** Bacterial phyla whose percentages in the gut microbiome were affected under high-fat, high-sugar, and high-fat high-sugar diets, at 18 weeks of diet. In each panel, the range of percentages of specific bacterial phyla under control (CTL), high-fat (HF), high-sugar (HS), and high-fat, high-sugar (HFHS) are represented. Dashed and dotted lines represent the median and interquartile separations, respectively. Asterisks indicate statistically significant differences and represent p-values adjusted using the Holm–Bonferroni method (\*:  $0.05 > p > 0.005$ ; \*\*\*:  $p < 0.0005$ ; ns: non-significant).

**Supplementary Table S1.** Proximate composition and principal lipid and carbohydrate components of the control and high-fat diets.

| <b>Parameters</b>            | <b>Components</b>                   | <b>CTL</b> | <b>HF</b> |
|------------------------------|-------------------------------------|------------|-----------|
| <b>Proximate composition</b> | Protein (% by weight)               | 19         | 25        |
|                              | Lipids (% by weight)                | 4          | 30        |
|                              | Carbohydrate (% by weight)          | 71         | 38        |
|                              | Fiber (% by weight)                 | 2          | 3         |
|                              | Ash (% by weight)                   | 4          | 4         |
| <b>Specific components</b>   | Starch (% of total carbohydrate)    | 92         | 92        |
|                              | Sucrose (% of total carbohydrate)   | 8          | 8         |
|                              | Polyunsaturated (% of total lipids) | 59         | 59        |
|                              | Monounsaturated (% of total lipids) | 24         | 24        |
|                              | Saturated (% of total lipids)       | 17         | 17        |

Abbreviations used: CTL, control diet; HF, high-fat diet. Diets were purchased from Mucedola s.r.l. (Milan, Italy).

**Supplementary table S2.** Pairwise comparisons of Chao1 index between specific diet and time conditions calculated with the Mann-Whitney test (related to figure 1E).

|         | CTL_0W   | CTL_9W     | CTL_18W | HF_0W     | HF_9W   | HF_18W   | HFHS_0W  | HFHS_9W  | HS_18W    | HS_0W     | HS_9W |
|---------|----------|------------|---------|-----------|---------|----------|----------|----------|-----------|-----------|-------|
| CTL_9W  | 0.00952* | -          | -       | -         | -       | -        | -        | -        | -         | -         | -     |
| CTL_18W | 1        | 1          | -       | -         | -       | -        | -        | -        | -         | -         | -     |
| HF_0W   | 1        | 0.00039*** | 0.1442  | -         | -       | -        | -        | -        | -         | -         | -     |
| HF_9W   | 1        | 1          | 1       | 0.27076   | -       | -        | -        | -        | -         | -         | -     |
| HF_18W  | 0.05237  | 1          | 1       | 0.00918*  | 1       | -        | -        | -        | -         | -         | -     |
| HFHS_0W | 1        | 0.00654*   | 0.85053 | 1         | 0.68523 | 0.04201* | -        | -        | -         | -         | -     |
| HFHS_9W | 1        | 1          | 1       | 0.00842*  | 1       | 1        | 0.84728  | -        | -         | -         | -     |
| HS_18W  | 0.04862* | 1          | 1       | 0.00225** | 1       | 1        | 0.03649* | 1        | -         | -         | -     |
| HS_0W   | 1        | 0.0002***  | 0.44957 | 1         | 1       | 0.00611* | 1        | 0.01357* | 0.00185** | -         | -     |
| HS_9W   | 1        | 0.19233    | 1       | 0.08542   | 1       | 0.22797  | 1        | 1        | 1         | 0.19233   | -     |
| HS_18W  | 0.19233  | 1          | 1       | 0.00293** | 1       | 1        | 0.06473  | 1        | 1         | 0.00327** | 1     |

Abbreviations used: CTL, control group; HF, high-fat diet; HS, high-sugar diet; HFHS, high-fat, high-sugar diet; 0 weeks, 0W; 9 weeks, 9W; 18 weeks, 18W. Asterisks indicate statistically significant differences and represent p – values adjusted with the Bonferroni method (\*:  $0.05 > p > 0.005$ ; \*\*:  $0.005 > p > 0.0005$ ; \*\*\*:  $p < 0.0005$ ).

**Supplementary table S3.** Pairwise comparisons of the Fisher index between specific diet and time conditions calculated with the Mann-Whitney test (related to figure 1F).

|                | CTL_0W    | CTL_9W     | CTL_18W | HF_0W      | HF_9W   | HF_18W      | HFHS_0W | HFHS_9W   | HS_18W    | HS_0W     | HS_9W |
|----------------|-----------|------------|---------|------------|---------|-------------|---------|-----------|-----------|-----------|-------|
| <b>CTL_9W</b>  | 0.01328*  | -          | -       | -          | -       | -           | -       | -         | -         | -         | -     |
| <b>CTL_18W</b> | 1         | 1          | -       | -          | -       | -           | -       | -         | -         | -         | -     |
| <b>HF_0W</b>   | 1         | 0.00039*** | 0.08542 | -          | -       | -           | -       | -         | -         | -         | -     |
| <b>HF_9W</b>   | 1         | 1          | 1       | 0.05052    | -       | -           | -       | -         | -         | -         | -     |
| <b>HF_18W</b>  | 0.00439** | 1          | 1       | 0.00037*** | 1       | -           | -       | -         | -         | -         | -     |
| <b>HFHS_0W</b> | 1         | 0.01904*   | 1       | 1          | 0.84728 | 0.01815*    | -       | -         | -         | -         | -     |
| <b>HFHS_9W</b> | 0.37108   | 1          | 1       | 0.00356**  | 1       | 1           | 0.54976 | -         | -         | -         | -     |
| <b>HS_18W</b>  | 0.01357*  | 1          | 1       | 0.00131**  | 1       | 1           | 0.05052 | 1         | -         | -         | -     |
| <b>HS_0W</b>   | 1         | 0.0002***  | 0.54735 | 1          | 0.23499 | 0.000098*** | 1       | 0.00293** | 0.00068** | -         | -     |
| <b>HS_9W</b>   | 1         | 0.15288    | 1       | 0.1442     | 1       | 0.01357*    | 1       | 0.56927   | 0.23499   | 0.29786   | -     |
| <b>HS_18W</b>  | 0.12077   | 1          | 1       | 0.00185**  | 1       | 1           | 0.1442  | 1         | 1         | 0.00327** | 1     |

Abbreviations used: CTL, control group; HF, high-fat diet; HS, high-sugar diet; HFHS, high-fat, high-sugar diet; 0 weeks, 0W; 9 weeks, 9W; 18 weeks, 18W. Asterisks indicate statistically significant differences and represent p – values adjusted with the Bonferroni method (\*:  $0.05 > p > 0.005$ ; \*\*:  $0.005 > p > 0.0005$ ; \*\*\*:  $p < 0.0005$ ).

**Supplementary table S4.** Pairwise PERMANOVA for comparison of time points within each diet calculated with adonis function.

| Time pair |          | p-value  |
|-----------|----------|----------|
| CTL_0W    | CTL_9W   | 0.0014** |
| CTL_9W    | CTL_18W  | 0.0602   |
| HF_0W     | HF_9W    | 0.0014** |
| HF_9W     | HF_18W   | 0.1479   |
| HS_0W     | HS_9W    | 0.0014** |
| HS_9W     | HS_18W   | 0.0196*  |
| HFHS_0W   | HFHS_9W  | 0.0014** |
| HFHS_9W   | HFHS_18W | 0.1826   |

Abbreviations used: CTL, control group; HF, high-fat diet; HS, high-sugar diet; HFHS, high-fat, high-sugar diet; 0 weeks, 0W; 9 weeks, 9W; 18 weeks, 18W. Asterisks indicate statistically significant differences and represent p – values adjusted using the Benjamini-Hochberg procedure (\*:  $0.05 > p > 0.005$ ; \*\*:  $0.005 > p > 0.0005$ ).



**Supplementary table S5.** Pairwise PERMANOVA for comparison of diets calculated with adonis function.

| Diet pair |      | p-value  |
|-----------|------|----------|
| CTL       | HF   | 0.0132*  |
| CTL       | HFHS | 0.003**  |
| CTL       | HS   | 0.004**  |
| HF        | HFHS | 0.07     |
| HF        | HS   | 0.003**  |
| HFHS      | HS   | 0.0045** |

Abbreviations used: CTL, control group; HF, high-fat diet; HS, high-sugar diet; HFHS, high-fat, high-sugar diet. Asterisks indicate statistically significant differences and represent p – values adjusted using the Benjamini-Hochberg procedure (\*:  $0.05 > p > 0.005$ ; \*\*:  $0.005 > p > 0.0005$ ).

**Supplementary table S6.** Pairwise PERMANOVA for comparison of diets within each time point calculated with adonis function.

| Week | Diet pair |          | p-value    |
|------|-----------|----------|------------|
| 0    | CTL_0W    | HF_0W    | 0.243443   |
| 0    | CTL_0W    | HFHS_0W  | 0.261871   |
| 0    | CTL_0W    | HS_0W    | 0.449429   |
| 0    | HF_0W     | HS_0W    | 0.511754   |
| 0    | HF_0W     | HFHS_0W  | 0.511754   |
| 0    | HFHS_0W   | HS_0W    | 0.639      |
| 9    | CTL_9W    | HF_9W    | 0.014943*  |
| 9    | CTL_9W    | HFHS_9W  | 0.001404** |
| 9    | CTL_9W    | HS_9W    | 0.03*      |
| 9    | HF_9W     | HFHS_9W  | 0.165559   |
| 9    | HF_9W     | HS_9W    | 0.001404** |
| 9    | HFHS_9W   | HS_9W    | 0.001404** |
| 18   | CTL_18W   | HF_18W   | 0.001404** |
| 18   | CTL_18W   | HFHS_18W | 0.001404** |
| 18   | CTL_18W   | HS_18W   | 0.001404** |
| 18   | HF_18W    | HFHS_18W | 0.003882** |
| 18   | HF_18W    | HS_18W   | 0.001404** |
| 18   | HFHS_18W  | HS_18W   | 0.011423*  |

Abbreviations used: CTL, control group; HF, high-fat diet; HS, high-sugar diet; HFHS, high-fat, high-sugar diet; 0 weeks, 0W; 9 weeks, 9W; 18 weeks, 18W. Asterisks indicate statistically significant differences and represent p – values adjusted using the Benjamini-Hochberg procedure (\*:  $0.05 > p > 0.005$ ; \*\*:  $0.005 > p > 0.0005$ ).

**Supplementary table S7.** Differential abundance of bacterial phyla between 0 and 9 weeks and between 9 and 18 weeks, under the control diet, calculated with ANCOM-BC.

| Phylum            | 0 – 9 weeks | 9 – 18 weeks |
|-------------------|-------------|--------------|
| Actinobacteriota  | 1           | 1            |
| Bacteroidota      | 1           | 1            |
| Cyanobacteria     | 0.001327**  | 1            |
| Deferribacterota  | 1           | 1            |
| Desulfobacterota  | 0***        | 0***         |
| Firmicutes        | 0.836339    | 1            |
| Patescibacteria   | 1           | 1            |
| Proteobacteria    | 1.57E-05*** | 1            |
| Verrucomicrobiota | 0.626909    | 1            |
| (Unknown)         | 1           | 1            |

Asterisks indicate statistically significant differences and represent p-values adjusted using the Holm–Bonferroni method (\*\*:  $0.005 > p > 0.0005$ ; \*\*\*:  $p < 0.0005$ ).

**Supplementary table S8.** Differential abundance of bacterial genera between 0 and 9 weeks and between 9 and 18 weeks, under the control diet, calculated with ANCOM-BC.

| Phylum           | Genus                                     | 0 – 9 weeks | 9 – 18 weeks |
|------------------|-------------------------------------------|-------------|--------------|
| Actinobacteriota | <i>Bifidobacterium</i>                    | 1           | 0.046916*    |
| Actinobacteriota | <i>Coriobacteriaceae</i> UCG-002          | 1           | 1            |
| Actinobacteriota | <i>Olsenella</i>                          | 1           | 1            |
| Actinobacteriota | <i>Enterorhabdus</i>                      | 1           | 1            |
| Actinobacteriota | <i>Parvibacter</i>                        | 0.459963    | 1            |
| Bacteroidota     | <i>Bacteroides</i>                        | 0***        | 1            |
| Bacteroidota     | <i>Odoribacter</i>                        | 0***        | 0***         |
| Bacteroidota     | <i>Muribaculaceae</i>                     | 0.459963    | 1            |
| Bacteroidota     | <i>Prevotellaceae</i> UCG-001             | 0***        | 1            |
| Bacteroidota     | <i>Alistipes</i>                          | 1           | 1            |
| Bacteroidota     | <i>Rikenellaceae</i> RC9 gut group        | 0***        | 0.698725     |
| Cyanobacteria    | <i>Gastranaerophilales</i>                | 0.019896*   | 1            |
| Deferribacterota | <i>Mucispirillum</i>                      | 1           | 1            |
| Firmicutes       | <i>Anaeroplasma</i>                       | 0***        | 1            |
| Firmicutes       | <i>Faecalibaculum</i>                     | 0.180051    | 1            |
| Firmicutes       | <i>Turicibacter</i>                       | 1           | 1            |
| Firmicutes       | <i>Lactobacillus</i>                      | 1           | 1            |
| Firmicutes       | <i>Christensenellaceae</i> R-7 group      | 0***        | 1            |
| Firmicutes       | <i>Clostridia</i> UCG-014                 | 0.02095*    | 1            |
| Firmicutes       | <i>Clostridia</i> vadinBB60 group         | 1           | 1            |
| Firmicutes       | Candidatus <i>Arthromitus</i>             | 0.197368    | 1            |
| Firmicutes       | <i>Clostridium</i> sensu stricto 1        | 1           | 1            |
| Firmicutes       | <i>Anaerofustis</i>                       | 0***        | 0***         |
| Firmicutes       | <i>Defluviitaleaceae</i> UCG-011          | 0***        | 0***         |
| Firmicutes       | [ <i>Eubacterium</i> ] fissicatena group  | 1           | 0.174052     |
| Firmicutes       | [ <i>Eubacterium</i> ] xylanophilum group | 1           | 1            |
| Firmicutes       | <i>Lachnospiraceae</i> A2                 | 1           | 1            |
| Firmicutes       | <i>Acetatifactor</i>                      | 0.027522*   | 1            |
| Firmicutes       | ASF356                                    | 0.632048    | 1            |
| Firmicutes       | <i>Blautia</i>                            | 0.002945**  | 0.341273     |
| Firmicutes       | <i>Eisenbergiella</i>                     | 0***        | 1            |
| Firmicutes       | GCA-900066575                             | 1           | 1            |
| Firmicutes       |                                           | 0.000356**  |              |
|                  | <i>Lachnoclostridium</i>                  | *           | 1            |
| Firmicutes       | <i>Lachnospiraceae</i> FCS020 group       | 1           | 1            |
| Firmicutes       | <i>Lachnospiraceae</i> NK4A136 group      | 1           | 0.011254*    |
| Firmicutes       | <i>Lachnospiraceae</i> UCG-001            | 0***        | 1            |
| Firmicutes       | <i>Lachnospiraceae</i> UCG-006            | 0.157921    | 0.438525     |
| Firmicutes       | <i>Marvinbryantia</i>                     | 1           | 0.300551     |
| Firmicutes       | <i>Roseburia</i>                          | 1           | 1            |
| Firmicutes       | <i>Tuzzerella</i>                         | 1           | 1            |
| Firmicutes       | <i>Tyzzereella</i>                        | 0***        | 1            |

|                   |                                       |           |          |
|-------------------|---------------------------------------|-----------|----------|
| Firmicutes        | <i>Monoglobus</i>                     | 0***      | 1        |
| Firmicutes        | [Eubacterium] coprostanoligenes group | 1         | 0.913246 |
| Firmicutes        | <i>Butyricicoccus</i>                 | 0.005745* | 1        |
| Firmicutes        | UCG-009                               | 1         | 1        |
| Firmicutes        | <i>Colidextribacter</i>               | 1         | 0.810594 |
| Firmicutes        | <i>Intestinimonas</i>                 | 1         | 0.321201 |
| Firmicutes        | NK4A214_group                         | 1         | 1        |
| Firmicutes        | <i>Oscillibacter</i>                  | 1         | 1        |
| Firmicutes        | UCG-005                               | 0***      | 1        |
| Firmicutes        | [Eubacterium] siraeum group           | 0***      | 1        |
| Firmicutes        | <i>Anaerotruncus</i>                  | 0.389384  | 1        |
| Firmicutes        | <i>Harryflintia</i>                   | 0.685968  | 1        |
| Firmicutes        | <i>Ruminococcaceae</i> Incertae sedis | 1         | 0.199761 |
| Firmicutes        | <i>Paludicola</i>                     | 1         | 1        |
| Firmicutes        | <i>Ruminococcaceae</i>                | 0***      | 1        |
| Firmicutes        | <i>Ruminococcus</i>                   | 0***      | 1        |
| Firmicutes        | UBA1819                               | 1         | 1        |
| Firmicutes        | UCG-010                               | 1         | 0.378722 |
| Firmicutes        | [Eubacterium] brachy group            | 1         | 1        |
| Firmicutes        | [Eubacterium] nodatum group           | 0***      | 0***     |
| Firmicutes        | <i>Anaerovorax</i>                    | 0.746359  | 0***     |
| Firmicutes        | Family_XIII_AD3011 group              | 0***      | 0***     |
| Firmicutes        | Family_XIII_UCG-001                   | 0.073102  | 1        |
| Firmicutes        | <i>Romboutsia</i>                     | 0***      | 1        |
| Patescibacteria   | Candidatus Saccharimonas              | 1         | 1        |
| Proteobacteria    | <i>Parasutterella</i>                 | 1         | 1        |
| Verrucomicrobiota | <i>Akkermansia</i>                    | 1         | 1        |
| (Unknown)         | (Unknown)                             | 1         | 1        |

Asterisks indicate statistically significant differences and represent p-values adjusted using the Holm–Bonferroni method (\*:  $0.05 > p > 0.005$ ; \*\*:  $0.005 > p > 0.0005$ ; \*\*\*:  $p < 0.0005$ ).
